# Supplementary material for: Arctic sea ice, Eurasia snow, and extreme winter haze in China
Source: PubMed Central journal article supplement — Sci Adv. 2017 Mar 15;3(3):e1602751. doi: 10.1126/sciadv.1602751 (PMC5351983; doi:10.1126/sciadv.1602751), 2017-03-15
Supplement: 1602751_SM.pdf [file 1602751_SM.pdf]

## Supplementary Materials for Arctic sea ice, Eurasia snow, and extreme winter haze in China

Yufei Zou, Yuhang Wang, Yuzhong Zhang, Ja-Ho Koo

Published 15 March 2017, *Sci. Adv.* **3**, e1602751 (2017)  
DOI: 10.1126/sciadv.1602751

### This PDF file includes:

- fig. S1. PCA decomposition and reconstruction of PPI.
- fig. S2. Cryosphere forcing specifications used in the CESM numerical experiments.
- fig. S3. Sensitivity response of the first coupled PPI and Z850 modes to cryospheric forcing.
- fig. S4. Comparison of surface air temperature in December between reanalysis data and numerical experiments.
- fig. S5. Time series of monthly WSI, ATGI, and PPI over the ECP region for January.
- table S1. A list of acronyms used in this study.
- table S2. Correlations among ventilation indices, PM observations, and cryospheric forcing factors.
- table S3. Climate and synoptic weather indices in the PCA.
- table S4. Correlation statistics among PCs and climate indices.
- table S5. PCR coefficients of the detrended PPI onto PC.
- table S6. The CMIP5 ensemble simulations used in this study.
- Reference (44)

## Supplementary Materials

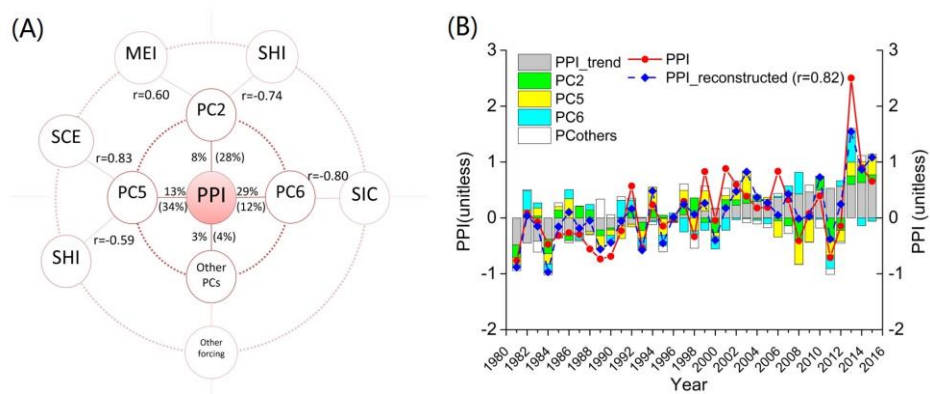

**fig. S1. PCA decomposition and reconstruction of PPI.** (A) attributions of detrended PPI to PCs; percentages in the inner ring are contributions to the extreme PPI in January 2013 (without parentheses) and the total variance (with parentheses) by each PC; the climate indices (table S2) most correlated with PC2, PC5, and PC6 are shown on the external ring; (B) comparison of original PPI and PCA reconstructed PPI; the PPI trend is added back to the reconstructed PPI. The correlation coefficient is shown in parenthesis.

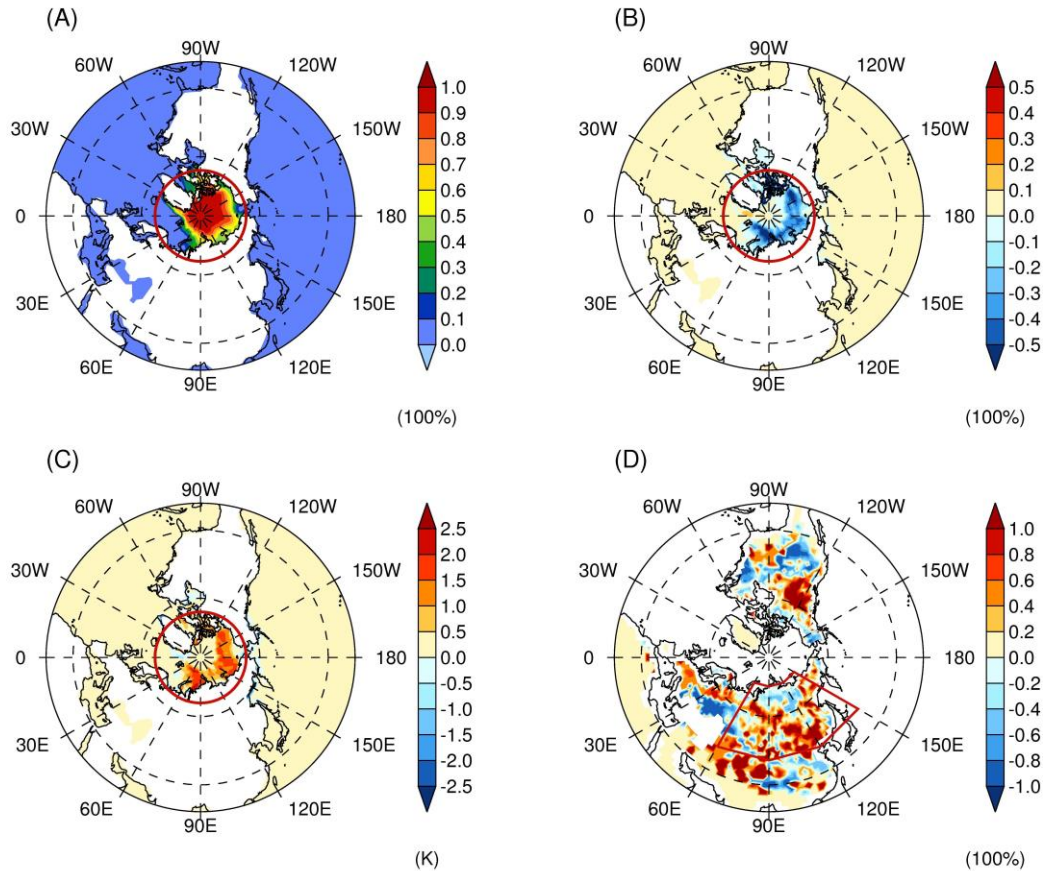

**fig. S2. Cryosphere forcing specifications used in the CESM numerical experiments.**

(A) Arctic SIC climatology (1981–2010) averaged from August to November (ASON); (B) Arctic SIC anomalies in autumn and early winter of 2012 (ASON averaged); (C) SST anomalies corresponding to SIC anomalies in (B); The red circles in (A), (B), and (C) denote the prescribed sea ice forcing region within the Arctic Circle ( $66.6^\circ \text{N}$ ); (D) Boreal SWE fractional anomalies averaged from October to November of 2012; the red polygon in (D) denotes the prescribed snow forcing region at mid- to high-latitudes ( $60^\circ \text{E}$  to  $150^\circ \text{E}$ ,  $40^\circ \text{N}$  to  $75^\circ \text{N}$ ) in SENS2/3; the regions are also shown in Fig. 1A.

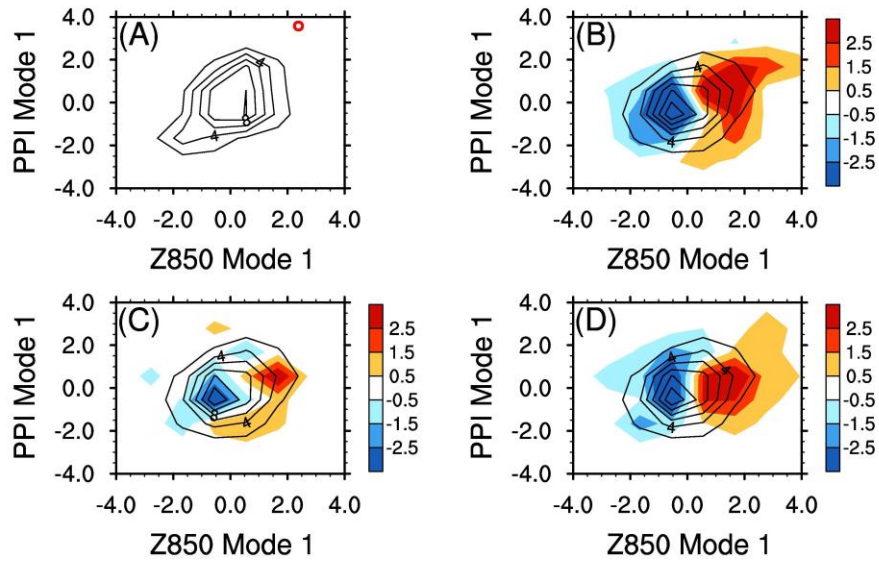

**fig. S3. Sensitivity response of the first coupled PPI and Z850 modes to cryospheric forcing.** (A) Density distribution of the first MCA modes of Z850 and PPI based on 35-year reanalysis data (contour lines from 2% to 10% at intervals of 2%; unit: %; the red circle is the data point for 2013); (B) density distribution of the first MCA modes in CTRL (contour lines from 2% to 12% at intervals of 2%; unit: %) and density distribution changes between SENS1 and CTRL (color shading; unit: %); (C)–(D) the same as (B) but for changes in SENS2 and in SENS3 from CTRL.

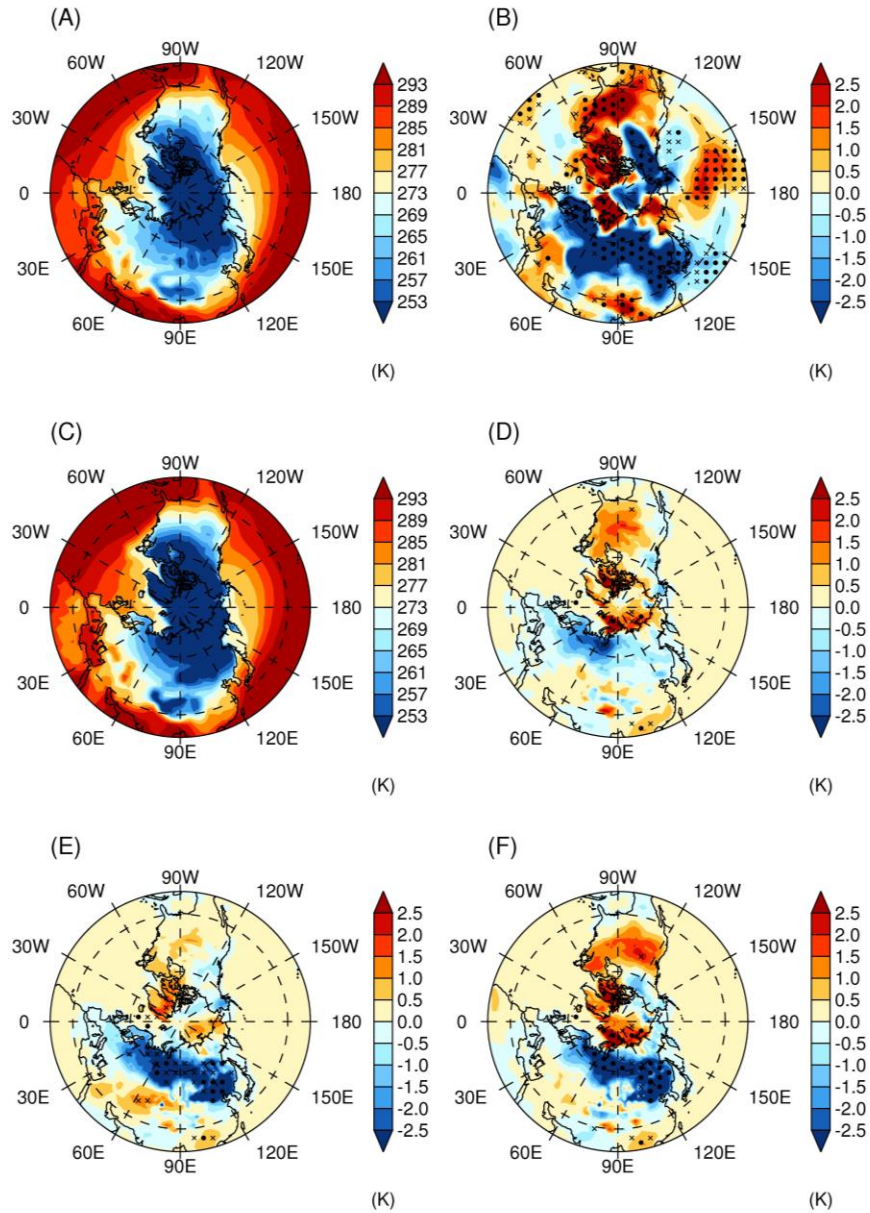

**fig. S4. Comparison of surface air temperature in December between reanalysis data and numerical experiments.** (A) SAT climatology (1981–2010) of reanalysis data; (B) SAT anomalies in December 2012 of reanalysis data; (C) ensemble averaged SAT climatology based on the CTRL simulation; (D) ensemble averaged SAT responses in SENS1 (SENS1-CTRL); (E)–(F) the same with (D) but for responses in SENS2 and in SENS3, respectively; In (B), (D), (E), and (F), black dots (cross) denote the 99% (95%) significance level based on the bootstrapping method.

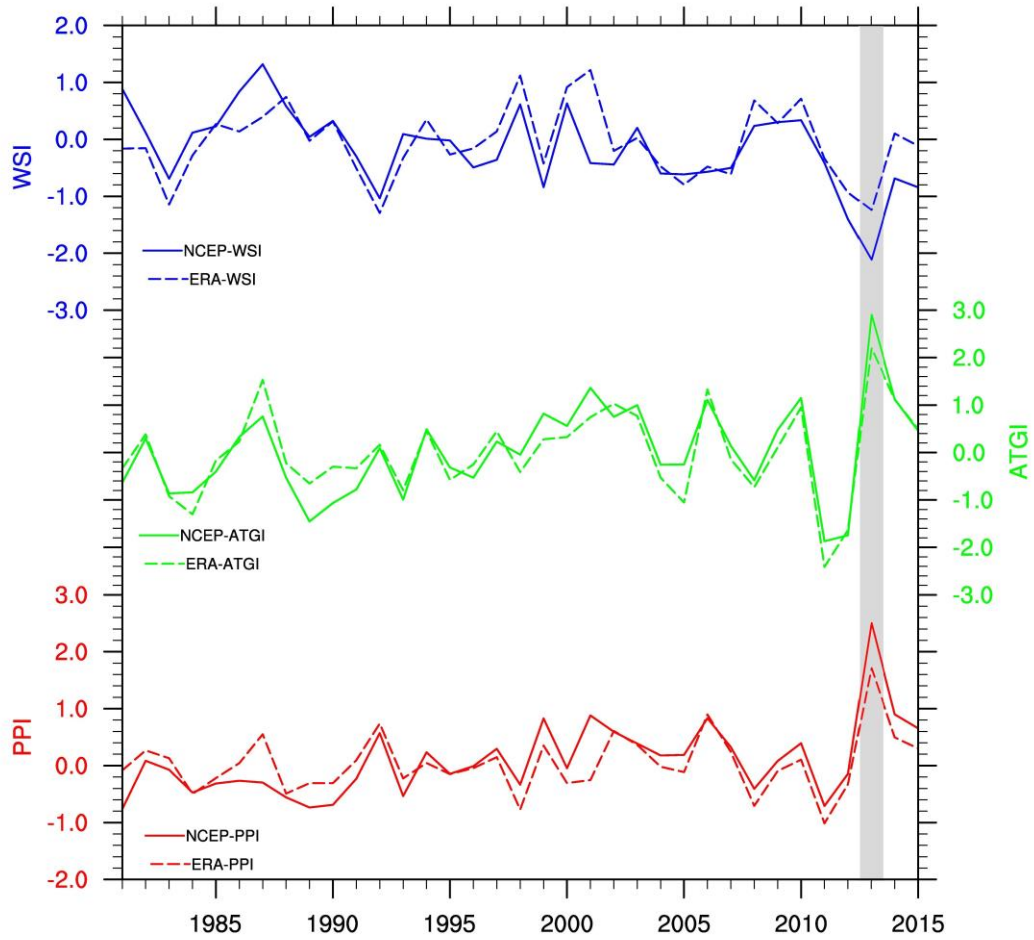

**fig. S5.** Time series of monthly WSI, ATGI, and PPI over the ECP region for January. The gray bar denotes 2013.

**table S1. A list of acronyms used in this study.**

| Abbr.     | Full Name                                                                        |
|-----------|----------------------------------------------------------------------------------|
| ECP       | East China Plains                                                                |
| EAWM      | East Asian Winter Monsoon                                                        |
| WSI       | Wind Speed Index                                                                 |
| ATGI      | Potential Air Temperature Gradient Index                                         |
| PPI       | Pollution Potential Index                                                        |
| MCA       | Maximum Covariance Analysis                                                      |
| PCA       | Principal Components Analysis                                                    |
| CESM      | Community Earth System Model                                                     |
| CMIP5     | the 5 <sup>th</sup> phase of the Coupled Model Inter-comparison Project          |
| PM        | Particulate Matter                                                               |
| ViI       | Visibility Inverse                                                               |
| AOD       | Aerosol Optical Depth                                                            |
| AO        | Arctic Oscillation                                                               |
| SIC       | Sea Ice Concentration                                                            |
| SCE       | Snow Cover Extent                                                                |
| ENSO      | El Niño/Southern Oscillation                                                     |
| PC        | Principal Component                                                              |
| CFI       | Cryospheric Forcing Index                                                        |
| Z850      | 850-hPa geopotential height                                                      |
| CTRL      | the control run of the sensitivity experiments                                   |
| SENS1/2/3 | the 1 <sup>st</sup> /2 <sup>nd</sup> /3 <sup>rd</sup> sensitivity simulation set |
| SST       | Sea Surface Temperature                                                          |
| SWE       | Snow Water Equivalent                                                            |
| CDF       | Cumulative Distribution Function                                                 |
| CAM5      | the Community Atmosphere Model version 5                                         |
| CCSM4     | the Community Climate System Model version 4                                     |
| GSOD      | the Global Surface Summary of the Day database                                   |
| NCDC      | the National Climatic Data Center                                                |
| MODIS     | the Moderate Resolution Imaging Spectroradiometer                                |
| NCEP      | the National Centers for Environmental Prediction                                |
| NCAR      | the National Center for Atmospheric Research                                     |
| NOAA      | the National Oceanic and Atmospheric Administration                              |
| HadISST   | Hadley Centre Sea Ice and Sea Surface Temperature data set                       |
| PCR       | Principal Components Regression                                                  |
| DJF       | December-January-February                                                        |
| kde2d     | the two-dimensional Kernel Density Estimation                                    |
| RCP4.5    | Representative Concentration Pathway 4.5                                         |



**table S2. Correlations among ventilation indices, PM observations, and cryospheric forcing factors.**

| Index                 | Data         | WSI (1981–2015) |         | ATGI (1981–2015) |         | PPI (1981–2015) |         |
|-----------------------|--------------|-----------------|---------|------------------|---------|-----------------|---------|
|                       | Availability | r               | p-value | r                | p-value | r               | p-value |
| PM <sub>10</sub> –ECP | 2005–2015    | –0.73           | <1E-2   | 0.70             | <1E-2   | 0.92            | <1E-3   |
| PM <sub>2.5</sub> –BJ | 2010–2015    | –0.80           | 0.01    | 0.58             | 0.09    | 0.79            | 0.07    |
| ViI                   | 1981–2013*   | –0.63           | <1E-3   | 0.36             | 0.17    | 0.62            | <1E-3   |
| Terra AOD             | 2001–2015    | –0.58           | <1E-2   | 0.21             | 0.36    | 0.43            | 0.02    |
| Aqua AOD              | 2003–2015    | –0.64           | <1E-3   | 0.28             | 0.25    | 0.50            | <1E-2   |
| Arctic SIC            | 1980–2014    | 0.45            | 0.01    | –0.26            | 0.29    | –0.43           | 0.04    |
| Asian SCE             | 1980–2014    | –0.42           | 0.01    | 0.55             | <1E-3   | 0.64            | <1E-3   |
| Boreal CFI            | 1980–2014    | –0.51           | <1E-2   | 0.49             | 0.01    | 0.65            | <1E-3   |

\* The 2014 to 2015 visibility data are not included due to a change of meteorological observation system in China after January 1<sup>st</sup> 2014 (44).



**table S3. Climate and synoptic weather indices in the PCA.**

| Component  | Index | Description                                                                                            | Equation/Source                                             |
|------------|-------|--------------------------------------------------------------------------------------------------------|-------------------------------------------------------------|
| Atmosphere | SHI   | Normalized regional mean of the sea level pressure (SLP) in the center of the Siberian High in January | $\overline{P_{slp}}$ (40°N to 60°N, 70°E to 120°E) (11)     |
|            | ALI   | Normalized regional mean of the SLP in the center of the Aleutian Low in January                       | $\overline{P_{slp}}$ (40°N to 60°N, 160°E to 160°W) (11)    |
|            | V850  | Normalized regional mean meridional wind speed at 850hPa in January                                    | $\overline{V_{850hPa}}$ (30°N to 60°N, 105°E to 150°E) (11) |
| Ocean      | AO    | Arctic oscillation index in January                                                                    | NOAA CPC (17)                                               |
|            | MEI   | Multivariate ENSO Index (MEI) in previous November-December                                            | NOAA CPC (23)                                               |
| Cryosphere | SIC   | Arctic Sea Ice Concentration (SIC) index in previous August-November                                   | HadISST (21)                                                |
|            | SCE   | Eurasian Snow Cover Extent (SCE) index in previous October-November                                    | GSL at Rutgers Univ. (22)                                   |

**table S4. Correlation statistics among PCs and climate indices.**

| r   | PPI   | SHI    | ALI    | V850  | AO     | SIC    | SCE   | MEI    |
|-----|-------|--------|--------|-------|--------|--------|-------|--------|
| PC1 | 0.10  | -0.50* | 0.71*  | 0.75* | 0.84*  | 0.45*  | -0.22 | -0.03  |
| PC2 | 0.53* | -0.74* | -0.41* | 0.43* | -0.39* | 0.30   | 0.26  | 0.60*  |
| PC3 | 0.08  | 0.02   | 0.37*  | 0.42* | -0.35* | -0.19  | 0.15  | -0.62* |
| PC4 | 0.15  | -0.32  | -0.35* | -0.18 | 0.05   | -0.04  | -0.45 | -0.50* |
| PC5 | 0.58* | -0.59* | -0.22  | 0.07  | -0.16  | 0.18   | 0.83* | 0.20   |
| PC6 | 0.34* | -0.07  | 0.08   | -0.03 | 0.01   | -0.80* | -0.04 | 0.07   |
| PC7 | 0.02  | 0.09   | -0.24  | 0.16  | 0.07   | -0.18  | 0.11  | -0.05  |

\* denotes > the 95% significance level.

**table S5. PCR coefficients of the detrended PPI onto PC.**

| PCR        | PC1  | PC2   | PC3   | PC4   | PC5  | PC6   | PC7   |
|------------|------|-------|-------|-------|------|-------|-------|
| Reg. coef. | 0.03 | -0.23 | -0.05 | -0.10 | 0.21 | -0.44 | -0.03 |
| p-value    | 0.42 | <1E-3 | 0.51  | 0.24  | 0.05 | 0.01  | 0.88  |

**table S6. The CMIP5 ensemble simulations used in this study.**

| Model Name   | Modeling Center                          | Institute ID | Ensemble Members                                  |
|--------------|------------------------------------------|--------------|---------------------------------------------------|
| CCSM4        | National Center for Atmospheric Research | NCAR         | r1i1p1, r2i1p1, r3i1p1,<br>r4i1p1, r5i1p1, r6i1p1 |
| CESM1(CAM5)  | Community Earth System Model             | NSF-DOE-NCAR | r1i1p1, r2i1p1, r3i1p1                            |
| Contributors |                                          |              |                                                   |
